# Supplementary material
Source: MDPI journal article supplement (https://www.mdpi.com/2673-4133/5/2/17)
Supplement: s1 [file s1]

**Table S1. Upazila-wise distribution of *haor* areas in different districts of Bangladesh**

| District     | No. of upazilas | No. of upazilas with haor | % of upazila with haor in a district | % of upazila with haor in Bangladesh |
|--------------|-----------------|---------------------------|--------------------------------------|--------------------------------------|
| Sunamganj    | 12              | 12                        | 100                                  | 2.4                                  |
| Sylhet       | 14              | 14                        | 100                                  | 2.8                                  |
| Habiganj     | 09              | 07                        | 78                                   | 1.4                                  |
| Moulvibazar  | 07              | 06                        | 86                                   | 1.2                                  |
| Netrakona    | 10              | 07                        | 70                                   | 2.8                                  |
| Kishoreganj  | 13              | 11                        | 85                                   | 2.2                                  |
| Brahmanbaria | 09              | 04                        | 44                                   | 0.8                                  |
| Total        | 74              | 61                        | 82                                   | -                                    |
| Bangladesh   | 495             | 61                        | -                                    | 12.3                                 |

**Table S2. Ranges and classes of soil pH in *haor* region during 2006–2021**

|       | HL               | MHL              | MLL              | LL               | VLL              |
|-------|------------------|------------------|------------------|------------------|------------------|
| Max   | 5.80             | 6.4              | 6.6              | 6.5              | 6.9              |
| Class | Slightlyacidic   | Slightlyacidic   | Neutral          | Slightlyacidic   | Neutral          |
| Min   | 3.60             | 3.55             | 3.6              | 3.5              | 3.4              |
| Class | Extremely acidic |

**Table S3.: Range and classes of soil pH in *haor* region during 1999–2002**

|       | MHL                 | MLL                 | LL                 | VLL                 |
|-------|---------------------|---------------------|--------------------|---------------------|
| Max   | 4.4                 | 6.4                 | 6.3                | 4.9                 |
| Class | Verystrongly acidic | Slightlyacidic      | Slightlyacidic     | Stronglyacidic      |
| Min   | 4.3                 | 4.0                 | 4.0                | 4.1                 |
| Class | Verystrongly acidic | Verystrongly acidic | Verystronglyacidic | Verystrongly acidic |

**Table S4. Land use by number of crops grown per year in *haor* districts in 2020**

| District              | Area under cropping (ha) |                |                |             | Cropping intensity |
|-----------------------|--------------------------|----------------|----------------|-------------|--------------------|
|                       | Single cropped           | Double cropped | Triple cropped | Net cropped |                    |
| <b>Brahmanbaria</b>   | 45865                    | 75495          | 10360          | 131720      | 173                |
| <b>Kishoreganj</b>    | 107412                   | 47928          | 56358          | 211698      | 176                |
| <b>Netrakona</b>      | 56949                    | 130674         | 29560          | 217183      | 187                |
| <b>Habiganj</b>       | 103113                   | 53989          | 32120          | 189222      | 162                |
| <b>Moulvibazar</b>    | 43555                    | 66939          | 17887          | 128381      | 180                |
| <b>Sunamganj</b>      | 174495                   | 64636          | 14725          | 253856      | 137                |
| <b>Sylhet</b>         | 54623                    | 128139         | 8983           | 191745      | 176                |
| <b>Haor districts</b> | 586012                   | 567800         | 169993         | 1323805     | 169                |
| <b>Bangladesh</b>     | 2111741                  | 4127126        | 1867611        | 8106478     | 197                |

**Table S5. Status of combine harvester and reaper in the *haor* region**

| District            | Combine harvester (no.) |      | % increase in combine harvester | Reaper (no.) |      | % increase in reaper |
|---------------------|-------------------------|------|---------------------------------|--------------|------|----------------------|
|                     | 2019                    | 2020 |                                 | 2019         | 2020 |                      |
| <b>Brahmanbaria</b> | 22                      | 39   | 77                              | 17           | 20   | 18                   |
| <b>Kishoreganj</b>  | 48                      | 88   | 83                              | 86           | 99   | 15                   |
| <b>Netrakona</b>    | 49                      | 102  | 108                             | 24           | 25   | 4                    |
| <b>Habiganj</b>     | 35                      | 57   | 63                              | 162          | 195  | 20                   |
| <b>Moulvibazar</b>  | 39                      | 44   | 13                              | 121          | 124  | 2                    |
| <b>Sunamganj</b>    | 98                      | 142  | 45                              | 203          | 213  | 5                    |
| <b>Sylhet</b>       | 57                      | 68   | 19                              | 171          | 173  | 1                    |
| <b>Total</b>        | 348                     | 540  | 55                              | 784          | 849  | 8                    |
